## **Wine terroir and the soil microbiome: an amplicon sequencing–based assessment of the Barossa Valley and its sub-regions**

1 **Jia Zhou<sup>1</sup>, Timothy R. Cavagnaro<sup>1</sup>, Roberta De Bei<sup>1</sup>, Tiffanie M. Nelson<sup>2</sup>, John R. Stephen<sup>1</sup>,**  
2 **Andrew Metcalfe<sup>3</sup>, Matthew Gilliam<sup>1,4</sup>, James Breen<sup>5,6,7</sup>, Cassandra Collins<sup>1,4</sup>, Carlos M.**  
3 **Rodríguez López<sup>1,7\*</sup>**

4 <sup>1</sup>School of Agriculture Food and Wine and Waite Research Institute, The University of Adelaide, PMB  
5 1, Glen Osmond, 5064, South Australia, Australia

6 <sup>2</sup>Queensland Facility for Advanced Bioinformatics, School of Medicine, Menzies Health Institute  
7 Queensland, Griffith University, Southport, QLD, Australia

8 <sup>3</sup>School of Mathematical Sciences, University of Adelaide, Adelaide, SA, Australia

9 <sup>4</sup>ARC Industrial Transformation Training Centre for Innovative Wine Production, Waite Research  
10 Institute, PMB 1, Glen Osmond, 5064, South Australia, Australia.

11 <sup>5</sup>Bioinformatics Hub, School of Biological Sciences, University of Adelaide, Adelaide, SA, Australia

12 <sup>6</sup>Robinson Research Institute, University of Adelaide, Adelaide, SA, Australia

13 <sup>7</sup>South Australian Health & Medical Research Institute, Adelaide, SA, Australia

14 <sup>8</sup>Environmental Epigenetics and Genetics Group; Department of Horticulture, College of Agriculture,  
15 Food and Environment, University of Kentucky, Lexington, KY, USA

### 16 **\* Correspondence:**

17 Dr Carlos Rodríguez López

18 E-mail:carlos.rodriguezlopez@uky.edu

19 **Keywords:** Terroir, vineyard soil microbiome, grapevine, Barossa Valley, Illumina, 16SrRNA.

20 **Word count:** 5,391 words

### 21 **Abstract**

22 Soil is an important factor that contributes to the uniqueness of a wine produced by vines grown in  
23 specific conditions. Recent data shows that the composition, diversity and function of soil microbial  
24 communities may play important roles in determining wine quality and indirectly affect its economic  
25 value. Here, we evaluated the impact of environmental variables on the soil microbiomes of 22 Barossa  
26 Valley vineyard sites based on the 16S rRNA gene hypervariable region 4. In this study, we report that  
27 environmental heterogeneity (soil plant-available P content, elevation, rainfall, temperature, spacing  
28 between row and spacing between vine) caused more microbial dissimilarity than geographic distance.  
29 Vineyards located in cooler and wetter regions showed lower beta diversity and a higher ratio of  
30 dominant taxa. Differences in microbial community composition were significantly associated with  
31 differences in fruit traits and in wine chemical and metabolomic profiles, highlighting the potential  
32 influence of microbial communities on the phenotype of grapevines. Our results suggest that  
33 environmental factors affect wine terroir, and this may be mediated by changes in microbial structure,  
34 thus providing a basic understanding of how growing conditions affect interactions between plants and  
35 their soil microbiomes.

## 37 1 Introduction

38 Wine price differs considerably depending on its quality (e.g., flavor, color and typicity), which is  
39 largely determined by the interactions between the grape and the growing conditions including climate,  
40 soil, topography, agricultural management, and the wine making process (Bokulich et al., 2016). These  
41 interactions influence the expression of wine's terroir (Bokulich et al., 2016; Jullian Fabres et al.,  
42 2017). Research on the drivers of terroir have predominantly focused on abiotic environmental factors,  
43 such as climate, soil, viticultural management and wine making process, studied individually (Mira de  
44 Orduña, 2010; Romero et al., 2016; Vega-Avila et al., 2015) and simultaneously (Van Leeuwen et al.,  
45 2004). However, little research has been done, in the context of terroir, on whether soil microbiomes  
46 exhibit distinct patterns of distribution at small geographic scales (e.g. neighboring vineyards), and  
47 whether vineyard microbiomes are associated with a wine's terroir (Burns et al., 2015; Bokulich et al.,  
48 2016).

49 Soil microbiomes, especially bacterial species, have been found to be qualitatively and quantitatively  
50 different between vineyard systems (Vega-Avila et al., 2015). Environmental factors, such as  
51 topography, climate, soil properties, cultivars and agricultural management, combine to affect soil  
52 microbial communities (Reeve et al., 2010; Castro et al., 2010; Lamb et al., 2011). It has been shown  
53 that climate and topography, including rainfall pattern and temperature, affect these communities  
54 through their impacts on soil (Burns et al., 2015). Soil properties such as soil texture, nitrogen (N)  
55 content, phosphorus (P) content, carbon to nitrogen (C:N) ratio, water content, and pH show significant  
56 effects on the diversity and composition of microbial communities (Girvan et al., 2003; Frey et al.,  
57 2004; Rousk et al., 2010; Fierer and Jackson, 2006). Plant genotypes exert an influence on the structural  
58 and functional diversity of soil microbiomes by varying root exudates and rhizodeposition (Broeckling  
59 et al., 2008; Dias et al., 2013; Philippot et al., 2013). Management practices, land use and varying  
60 degrees of stress and disturbance influence the soil microbiome markedly due to specific management  
61 objectives (Crowder et al., 2010; Lumini et al., 2011; Reeve et al., 2010; Sugiyama et al., 2010).

62 Soil microbiomes interact with the vines, and thus affect wine quality (Bokulich et al., 2016; Burns et  
63 al., 2015). The interaction between soil microorganisms and plants includes the facilitation of nutrient  
64 uptake/utilization, stabilization of soil structure, reduction of disease prevalence by out-competing soil-  
65 borne pathogens or increase of disease prevalence by microbial pathogen invasion (Edwards et al.,  
66 2014; Zarraonaindia et al., 2015). Soil microbiomes also contribute to the wine fermentation flora,  
67 ultimately affecting wine quality (Barata et al., 2012; Compant et al., 2011; Martins et al., 2013).  
68 However, microbial assemblage function is intrinsically difficult to measure and define because of its  
69 highly changeable nature (Nannipieri et al., 2003). Additionally, due to the complex interactions  
70 between soil microbes, the influence of certain microbial communities can be substituted by other  
71 microorganisms with the same ecological function (Nannipieri et al., 2003; Crowder et al., 2010; Lamb  
72 et al., 2011; Wittebolle et al., 2009).

73 The primary aim of this project was to assess if there is a relationship between soil microbiomes and  
74 terroir. To achieve this, we asked the following questions:

- 75 (i) Do wine sub-regions have distinct soil bacterial communities?;
- 76 (ii) What environmental conditions and agricultural practices shape soil bacterial community  
77 of vineyards?; and
- 78 (iii) Do differences in the soil bacterial community correlate with berry and wine  
79 characteristics?

80 In order to answer these questions, we undertook a soil microbiome survey in an iconic wine region,  
81 the Barossa in South Australia. The Barossa has a winemaking history of over 160 years and because  
82 of its importance as a growing region, has been chosen as a model to investigate terroir previously (  
83 Wolf et al., 2003; Edwards et al., 2014; Xie et al., 2017). Besides, the environmental characteristics of  
84 the Barossa, including climate, soil and topography have been previously characterized in detail  
85 (Robinson and Sandercock, 2014). However, to date, no study has analyzed the soil microbiomes of  
86 the Barossa wine region or the possible influence on wine properties. Thus, determining how soil  
87 microbiome diversity and composition are influenced by environmental factors, and how microbiome  
88 differences correlate with differences in fruit/wine composition, will provide a starting point from  
89 which to better understand the (potential) functional role of soil microbial communities in terroir.

## 90 **2 Materials and methods**

### 91 **2.1 Experimental design and plant material**

92 Twenty-two Barossa vineyards (Figure S1), planted with own-rooted Shiraz (*Vitis vinifera* L.) and  
93 representative of the climate, soil and management practices of six Barossa sub-regions (i.e. Eden  
94 Valley, Northern Grounds, Central Grounds, Eastern Edge, Western Ridge, Southern Grounds) were  
95 selected for this study. Three to four vineyards per sub-region were included and nine vines from three  
96 rows from each vineyard were selected for measurement and sampling. Vines within the same row  
97 were adjacent to each other. Vines adjacent to missing vines, end of row vines and border rows were  
98 excluded from the selection.

### 99 **2.2 Soil sampling protocol**

100 Three soil cores (0-10cm soil layer) were collected using a (20 mm diameter) soil auger from around  
101 each individual plant (approximately 10cm from the trunk) and combined, giving a total nine soil  
102 samples per row. A total of 594 soil samples were collected (27 soil samples from each vineyard) on  
103 the 2<sup>nd</sup> of November (Austral Spring) 2015. Soil samples were immediately stored at 4°C and returned  
104 to the laboratory on the same day of collection. Soil samples from the same row were thoroughly mixed  
105 to obtain three samples per vineyard, and a total of 66 samples across the study. Coarse debris was  
106 removed from each soil sample using a 2mm sieve, and each sample was then divided into three sub-  
107 samples (approximately 850 cm<sup>3</sup> each). The first subsample (approx. 20 g) was used for determination  
108 of soil gravimetric moisture content. The second was air-dried until a constant mass was achieved and  
109 used for analysis of soil texture, pH, electrical conductivity, and plant-available (Colwell) P  
110 (phosphorus), as described previously (Cavagnaro, 2015)). The third soil subsample was stored at -  
111 80°C for DNA extraction and downstream genomic analysis (see below).

### 112 **2.3 Vineyard physical characterization**

113 In this study, the climate was characterized on the basis of rainfall and temperature. The influence of  
114 topography was studied through elevation above sea level and vineyard orientation. Soil texture was  
115 determined following (Giddings, 2015). Soil pH and electrical conductivity were determined on a 1:5  
116 soil/water mixture and then measured using pH/salinity meter (WP-81 Conductivity-Salinity-pH-mV  
117 Meter, v6.0, TPS Pty Ltd). Plant-available phosphorus was extracted and measured using Colwell P  
118 method (Rayment and Higginson, 1992) (Table S1). The remaining soil, topographic and climatic data  
119 was obtained from the Barossa Grounds project (Robinson and Sandercock, 2014), while vineyard  
120 management information was collected from participating growers (Table S2).

### 121 **2.4 Fruit and wine chemical analysis**

122 Fruit juice pH and total acidity (TA) was measured using an autotitrator (Crison instruments Barcelona,  
123 Spain) (Iland et al. 2004). Total soluble solids (TSS) of juice samples were tested with a digital  
124 refractometer (BRX-242 Erma inc. Tokyo, Japan). A sample of 50 berries from random bunches on  
125 selected vines were collected and frozen at -20°C for anthocyanin, phenolic and tannin analyses. Total  
126 grape tannins were measured by the methyl cellulose precipitable (MCP) tannin assay (Sarneckis et al.  
127 2006) using the protocol of Mercurio et al. (2007). Total anthocyanin and phenolics were determined  
128 according the method of Iland et al. (2004) (Table S3).

129 One bottle of commercial wine per vineyard was used for the chemical analysis. Wine pH and TA was  
130 determined as described by Iland et al. (2004). Final alcohol levels were determined using an Alcozyer  
131 Wine ME (Anton Paar, Graz, Austria). Wine colour was determined using the modified Somers assay  
132 using a high throughput method in 96 well plates [98]. Wine tannin concentration was determined  
133 using the methyl cellulose precipitable (MCP) tannin assay of Mercurio et al. (2007) and is expressed  
134 as epicatechin equivalents (mg/L) using an 8-point epicatechin standard curve Sarneckis et al. (2006).  
135 The modified Somers assay was used to determine; wine colour density (WCD), SO<sub>2</sub>-corrected WCD,  
136 degree of anthocyanin ionisation, phenolic substances and anthocyanins (in mg/L) (Table S4).

137 Non-targeted metabolomic analysis of the wine samples was performed using LC-MS/MS. The  
138 metabolites were isolated from bottled wine samples using solid-phase extraction (SPE) with  
139 Phenomenex Strata-X 33 um 85Å polymeric reverse-phase 60mg/3mL cartridges. A 2 mL aliquot of  
140 each sample was evaporated to dryness under nitrogen at 30°C. SPE conditions are presented in Table  
141 S5. A pooled mix of all samples was prepared and used to monitor instrument performance. The  
142 analysis was performed on an Agilent 1200SL HPLC coupled to a Bruker microTOF-Q II in ESI  
143 negative mode. The operating conditions are described in Table S5 (Table S6-7).

144 Following data acquisition, mass calibration was performed on each file using Bruker Daltonic's  
145 DataAnalysisViewer4.1 "Enhanced Quadratic" calibration method (Bruker Singapore, The Helios,  
146 Singapore). Each file was exported from DataAnalysis in the mzXML generic file format for further  
147 processing. The files were processed using R (statistical programming environment) v3.1.0 and  
148 Bioconductor v2.14 under a Debian Linux 64-bit environment. Molecular features were extracted for  
149 each file using xcmx package and features that possessed a common mass and retention time across  
150 samples were grouped together.

## 151 **2.5 16S rRNA Gene Next Generation Sequencing library preparation**

152 DNA extractions from soil 66 samples were carried out at the Australian Genome Research Facility  
153 (AGRF) (Adelaide node) using MoBio Powersoil kit (MoBio Laboratories, Inc) following the  
154 manufacture's protocol. DNA concentrations were estimated using a Nanodrop 2000  
155 spectrophotometer (Thermo Fisher Scientific, Waltham, MA, USA) and normalized to 5 ng/μl using  
156 nanopure water.

157 Primers 515F and 808R (Bates et al., 2011; Caporaso et al., 2011) specific for the Bacterial 16S rRNA  
158 gene hypervariable "V4" region were used for PCR amplification of extracted DNA and to prepare  
159 amplicon libraries. 515F worked as a universal forward primer for all the samples and 808R included  
160 12-base sample specific barcodes to allow downstream de-multiplexing (Table S8).

161 Three replicated PCR reactions were performed for each of the 66 samples. Each of these runs included  
162 one negative control as 'sample67' with no template DNA added. PCR reactions included 10ng of  
163 extracted DNA, 12.5 μl Q5 high-fidelity 2\*master mix (New England Biolabs), 8.5 μl dH<sub>2</sub>O, 1μl  
164 forward and reverse primers (10 μM) in 25μl reaction system. The PCR thermocycler (Bio-Rad T100)

165 program was 95°C for 6min, followed by 38 cycles of 95°C for 30sec, 50°C for 30sec and 72°C for  
166 1m30sec.

167 Success of PCR reactions was verified by agarose gel (1.5% w/v) electrophoresis. Samples exhibiting  
168 weak bands were reamplified by adjusting the amount of DNA template. The triplicate reactions were  
169 then pooled into 67 pools. Individual pools were quantified by Qubit fluorometric double stranded  
170 DNA assay (Invitrogen, Carlsbad, CA, USA) and then mixed on an equimolar base to generate six  
171 pools each with 11 samples (each containing 5 ul of the water control pool). Pools were size-selected  
172 to remove unused primers using Agencourt® AMPure® XP (Beckman Coulter, Brea, CA, USA)  
173 following the manufacturer's protocol and mixed to equimolar concentrations to make one final pool.  
174 Library concentration and fragment size were estimated using TapeStation (Agilent, Santa Clara, CA,  
175 USA) and sequenced on the Illumina MiSeq platform (300 bp PE) (Illumina, San Diego, CA, USA) at  
176 the Australian Genome Research Facility-Adelaide node (AGRF).

## 177 **2.6 Bioinformatics analysis**

178 Raw Illumina sequencing data was quality filtered and demultiplexed at AGRF-Adelaide node.  
179 Forward and reverse sequences passing QC filter were merged using *bbmerge* (Bushnell, 2016).

180 Merged reads were analyzed using Quantitative Insight Into Microbial Ecology (QIIME) (QIIME  
181 version 1.8.0) (Navas-Molina et al., 2013). Operational taxonomic units (OTUs) were clustered using  
182 open-reference picking with the default *uclust* method (Edgar, 2010) based on 97% sequence similarity  
183 to the 16S rRNA Greengenes database (McDonald et al., 2012; DeSantis et al., 2006). OTUs were  
184 aligned to the Greengenes core reference database using *PyNAST* (Caporaso et al., 2010). Ribosomal  
185 Database Project (RDP) classifier was used to assign taxonomy (Wang et al., 2007). Both closed-  
186 reference OTU picking and open-reference OTU picking were performed for later analyses.

187 A BIOM file was generated after OTU picking, then OTUs identified in the negative control samples  
188 were removed from soil sample OTUs, leaving between 37,176 and 114,777 OTUs per sample (mean  
189 = 60,147 OTUs). Data with and without rarefaction were used for alpha diversity and beta diversity  
190 analyses. 37,176 OTUs (the lowest amount of OTUs in one sample) were randomly selected from each  
191 sample for rarefaction.

192 Alpha diversity (within-sample species richness and evenness) was measured using non-phylogenetic  
193 (including the observed number of OTUs and the Chao 1 estimator of the total number that would be  
194 observed with infinite sampling) and phylogenetic (Faith's Phylogenetic Diversity) indices (Faith,  
195 1992). Phylogenetic beta diversity (between-sample diversity) was calculated using both weighted and  
196 unweighted UniFrac (Lozupone and Knight, 2005) and three-dimensional principal coordinates  
197 analysis (PCoA) plots were built through Emperor (Vázquez-Baeza et al., 2013). We then constructed  
198 a neighbor joining ultrametric tree in QIIME from the beta diversity UniFrac distance matrix. The  
199 generated tree file, as well as the Barossa Valley geographical map, vineyard locations and taxa  
200 summary files, were input into GenGIS (Parks et al., 2009, 2013) to visualize the relationship between  
201 soil bacterial beta diversity and vineyard location. The statistical significance of this relationship was  
202 determined using the Mantel test based on 9,999 random permutations and implemented on GenAlex  
203 v6.5 (Peakall and Smouse, 2012).

204 To identify the association of environmental variables and grape and wine properties (Table S1-S7)  
205 with soil bacterial microbiome, bacterial community dissimilarities were visualized with non-metric  
206 multidimensional scaling (nMDS) plots. Variables were fitted to the ordination plots using the function  
207 *envfit* in the package *Vegan version 2.5-2* (Oksanen et al., 2013) implemented in R version 3.5.0 (Team,

208 2013). Spearman's rank correlation coefficients were measured between individual taxon abundance  
209 and fruit and wine traits using the function *rcorr* in the package *Hmisc*. Grape traits included those  
210 from sensory, basic chemistry analyses, while wine traits included basic chemistry, wine fermentation  
211 products and amino acids concentration. Those traits and taxa with a significant (p-value <0.05)  
212 correlation coefficient larger than 0.80 or lower than -0.80 were deemed as significantly associated.

213 To identify which variables are important in explaining the composition of the soil microbial  
214 community, we performed distance-based redundancy analysis (dbRDA), a form of multivariate  
215 multiple regression that we performed directly on a Bray-Curtis dissimilarity matrix of OTUs using  
216 the ADONIS function in *Vegan*. We used automatic model building using the function *step* in R. The  
217 step function uses Akaike's Information Criterion (AIC) in model choice, which is based on the  
218 goodness of fit. The model building proceeds by steps until the 'best' fit is identified. If two predictor  
219 variables were highly correlated (>0.85) one, typically that which was more difficult to measure, was  
220 removed as well as variables with missing replicates (Variables included in the automatic model  
221 building are marked with \* in Tables S2-S8). Differential statistic functions within the *edgeR* package  
222 (Chen et al., 2008) was used, as in Weis et al. (2017) to determine the significantly different taxa  
223 between vineyards separated by the main environmental drivers of beta diversity (i.e. soil type and soil  
224 phosphorous content). In order to avoid the influence of taxa showing low counts, a minimum threshold  
225 was set up at 100 counts per million.

## 226 **3 Results**

### 227 **3.1 Analysis of soil properties**

228 Of the three soil physicochemical properties tested, plant-available phosphorous (P) and electrical  
229 conductivity (a measure of soil salinity), differed significantly (Kruskal-Wallis: p-value < 0.05)  
230 between sub-regions of the Barossa (Table S1). Plant-available P was lowest in the Northern Grounds  
231 ( $11.5 \pm 2.7 \mu\text{g P/g soil}$ ) and highest in the Eastern Edge ( $39.0 \pm 14.2 \mu\text{g P/g soil}$ ). Electrical conductivity  
232 ranged from 111.0 uS/cm (Northern Grounds, SE=34.2) to 302.5 uS/cm (Central Grounds, SE=123.5).  
233 Soil pH did not differ between sub-regions, ranging from 6.2 (Eden Valley, SE=0.4) to 6.8 (Southern  
234 Grounds, SE=0.5).

### 235 **3.2 Barossa Valley soil bacteria community composition**

236 After quality filtering of the raw sequencing results, an average of 130,949 paired sequences remained  
237 per sample. Of these an average of 86,835 paired-end sequences per sample (66.3%) could be joined  
238 using *bbmerge* (Table S9).

239 Both bacterial and archaeal DNA was detected in all soil samples. A total of 98.9% of sequences were  
240 classifiable at the phylum level (Figure 1A) and 95.2% at the genus level. Of those classifiable at the  
241 phylum level, 96.5% were assigned to one of nine dominant groups (relative abundance  $\geq 1.0\%$ ) in the  
242 samples namely: Actinobacteria (26.9%), Proteobacteria (26.7%), Acidobacteria (12.0%),  
243 Planctomycetes (6.2%), Chloroflexi (5.6%), Firmicutes (5.3%), Gemmatimonadetes (3.9%),  
244 Bacteroidetes (3.5%), Verrucomicrobia (2.5%) (Figure 1A). The only dominant Archaea group was  
245 Crenarchaeota (4.0%). The overall dominant Bacteria and Archaea groups were consistently present in  
246 the six regions, but at different ratios (Figure 1A). The phylogenetic inference of microbiome  
247 composition differences between sub-regions showed three clusters with Central and Northern  
248 Grounds, and Eden Valley and Western Ridge sharing the more similar microbial profiles (Figure 1A).

249 The number of observed OTUs (Figure 1B) showed significant differences (t-test: p-value < 0.05)  
250 between the OTU rich sub-regions (Northern and Central Grounds) and the relatively OTU poor sub-  
251 regions (Eden Valley and Western Ridge) (Table S10). Similarly, the Chao1 metric showed that  
252 Northern and Central Grounds presented higher levels of OTU richness while Eden Valley and Western  
253 Ridge had the lowest (Figure 1C). Pairwise comparison of alpha diversity between sub-regions showed  
254 significant differences (t-test, p-value < 0.05) between Northern Grounds and Eden Valley and Western  
255 Ridge and between Central Grounds and Eden Valley and Western Ridge (Table S11).

256 Dissimilarities in microbial communities between samples (i.e. beta diversity) were calculated as  
257 weighted and un-weighted UniFrac distances and both methods showed similar patterns, and so only  
258 analyses based on weighted results are shown here. For the most part, the three replicates from within  
259 a given vineyard were closely grouped on the ordination plot (Figure 2A), indicating that bacterial  
260 communities were consistent within sites. Pairwise analysis of the differences between groups  
261 (vineyards and sub-regions) showed that all vineyards and sub-regions are significantly different to  
262 each other (Adonis, p-value < 0.001). Mantel test analysis of the association between microbiome  
263 compositional differences and geographic distance, showed a small but significant correlation ( $r_{xy} =$   
264 0.315; p-value = 0.0001) (Figure 2B).

265 To further explore dissimilarities among and within regions, neighbor joining analysis was used to  
266 cluster samples and to generate a similarity tree in QIIME. This information, along with a geographical  
267 map of the regions and their locations, were combined using the GenGIS software package (Parks et  
268 al., 2009). This approach showed a low level of clustering of vineyards according to their geographic  
269 location (Figure 2C).

### 270 **3.3 Drivers of soil microbiome differentiation**

271 Model selection was used to identify the combination of variables that explained the greatest variation  
272 in the soil microbiome. This approach consistently selected soil plant-available phosphorus (P) and soil  
273 texture as the main drivers (Model: p-value = 0.001) of soil microbiomes in the Barossa vineyards  
274 tested (Figure 3). Together, both variables explained 19.7% of the observed variability. Independent  
275 pairwise analysis of UniFrac distances of vineyards grouped by these soil characteristics, showed that  
276 microbial communities in clay soil types were significantly dissimilar from those in sandy soils  
277 (PERMANOVA: p-value < 0.001, Figure 4A). Microbial communities in soils with high plant-  
278 available phosphorus ( $P > 30\text{mg/kg}$ ) were also dissimilar from those with low plant available  
279 phosphorous (PERMANOVA: p-value < 0.001, Figure 4C). Three and eight taxa were significantly  
280 more abundant in clay and sandy soils respectively (Figure 4B), while eight taxa were found  
281 significantly associated with low plant available phosphorous content, and three associated high levels  
282 of plant available phosphorous in soil (Figure 4D).

283 *Envfit* analysis identified a number of other environmental factors as individually associated with  
284 microbial community composition (Figure 5). Aside from plant available phosphorous ( $r_2 = 0.3706$ , p-  
285 value < 0.001), these variables were: elevation ( $r_2 = 0.3609$ , p-value < 0.001), growing season rainfall  
286 ( $r_2 = 0.2499$ , p-value < 0.001), mean annual rainfall ( $r_2 = 0.1621$ , p-value = 0.004), spacing between  
287 rows ( $r_2 = 0.1512$ , p-value = 0.006) and between vines ( $r_2 = 0.1561$ , p-value = 0.011), and growing  
288 season mean temperature ( $r_2 = 0.1113$ , p-value = 0.022).

289 Analysis of the correlation between individual environmental and vineyard management variables and  
290 taxa abundance, identified 4 positive (Spearman's  $>0.80$ , p-value < 0.001) and 3 negative (Spearman's  
291  $<-0.80$ , p-value < 0.001) significant correlations (Figure S2). Positive correlations with individual taxa  
292 included, pH (order iii1-15 and family Pirellulaceae), elevation (family Isosphaeraceae), and plant age

293 (family Hyphomicrobiaceae); while negative correlations included P (family OPB35), elevation  
294 (family Conexibacteraceae), and the spacing between vines on the same row (family Haliangiaceae).

### 295 **3.4 Terroir and vineyard soil microbiomes**

296 Twenty four of the 75 grape and wine characteristics included in the study displayed a significant  
297 correlation with the soil microbial community composition (Table 2). The strongest associations  
298 identified for each of the four groups of traits tested were: 50 berry weight and average color per berry  
299 (basic berry properties); total anthocyanins and total phenolics (basic wine chemistry); Glycine and  
300 Alanine (wine amino acids); and 2-phenyl ethyl ethanol and acetic acid (wine fermentation products).

301 Significant positive correlation (Spearman's  $>0.80$ ,  $p$ -value  $<0.05$ ) were identified between the  
302 abundance of one taxon (order IS\_44) and the average level of total phenolics mg/g berry weight  
303 (Figure S3A). Similarly, six wine traits showed positive correlations with the abundance of six  
304 microbial taxa (Figure S3B-E). Briefly, the genus *Rhodoplanes* was positively associated with the level  
305 of wine total phenolics and the family Chitinophagaceae was associated with color density of SO<sub>2</sub>  
306 corrected wine and with the level SO<sub>2</sub> resistant pigments in wine, while the family Kouleothrixaceae  
307 was positively correlated with wine color density.

## 308 **4 Discussion**

309 Previous studies have shown that environmental factors (e.g. climate and soil properties) and crop  
310 management may affect microbial populations in vineyards (Fierer, 2008; Burns et al., 2015; Weckert,  
311 2016). To better understand how these variables contribute to vineyard microbial communities and  
312 how microbial diversity and composition correlate with fruit and wine quality traits, we studied the soil  
313 microbiome composition of 22 commercial vineyards representative of the Barossa Valley wine region  
314 in Australia.

### 315 **4.1 Vineyard soil microbiome composition and diversity**

316 With over 37,176 sequences per sample we reached a sequencing depth higher than those achieved in  
317 previous studies deemed sufficient to resolve differences between similar samples (e.g. Liu et al., 2014;  
318 Burns et al. 2015). From a species composition point of view, our results indicate that vineyard soil  
319 microbiomes present similarities across the six sub-regions studied. All soils analyzed presented both  
320 bacteria and archaea. A total of 96.5% of the all identified sequences were allocated in one of nine  
321 main dominant phyla (relative abundance  $\geq 1.0\%$ ). Of these, eight (Actinobacteria, Proteobacteria,  
322 Acidobacteria, Planctomycetes, Chloroflexi, Firmicutes, Gemmatimonadetes, Bacteroidetes, and  
323 Verrucomicrobia) were Eubacteria, while only one dominant taxon was from Archeobacteria  
324 (Crenarchaeota). Although dominant phyla were consistently found in the six regions tested, they were  
325 present in different ratios. This finding is similar to earlier work; for example, investigating the Napa  
326 Valley American Viticultural Area (AVA), Burns et al. (2015) found the same nine top dominant  
327 bacteria groups, also with different ratios and order for each group. Similarly, Liu's et al. (2014)  
328 analysis of agricultural black soils in northeast China found almost the same dominant bacterial groups.  
329 Equally, analysis of non-agricultural soils by Faoro et al, (2010) and Lauber et al. (2009) identified the  
330 same dominant groups, with the exception of Verrucomicrobia which was replaced by Nitrospira  
331 (Faoro et al., 2010) and TM7 and Cyanobacteria replacing Planctomycetes and Chloroflexi (Lauber et  
332 al., 2009).

### 333 **4.2 Location, soil properties, climate and vineyard management contribute are associated with** 334 **soil microbial community dissimilarity in the Barossa**



335 Although dominant taxa were constant at a regional level, soil microbiome diversity and composition  
336 seemed to be a better factor separating soil microbiomes from different sub-regions. The phylogenetic  
337 inference of microbiome composition differences between sub-regions showed that OTU richer sub-  
338 regions (Northern and Central Grounds) clustered independently from the OTU poorer ones (Eden  
339 Valley and Western Ridge).

340 Previous studies have shown that the major factors determining compositional dissimilarities of soil  
341 microbiome between sites are dispersal constraints (which predicts that more distant soils should have  
342 greater phylogenetic dissimilarity) and environmental heterogeneity (Fierer, 2008; Liu et al., 2014;  
343 Burns et al., 2015). Analysis of the influence of geographical distance on soil microbiome composition  
344 differences between Barossa Valley Region vineyards showed a small significant correlation between  
345 both parameters. It could be argued that such small contributions to vineyard soil microbiome  
346 composition differences could be associated with the relatively small distances between the vineyards  
347 in this study (Average distance 11.7 km, minimum distance 0.7 km and maximum distance 26.5 km).  
348 However, this correlation was similar to that observed by Burns et al. (2015) when studying 19  
349 vineyards of the Napa Valley AVA that were separated by up to 53 km. This suggests that dispersal  
350 constraints contribute to soil microbiome differences at a much smaller scale than previously perceived.

351 Environmental heterogeneity has been found to be more important than geographic distance in shaping  
352 bacterial community at different geographical scales (Fierer and Jackson, 2006; Miura et al., 2017; da  
353 C Jesus et al., 2009; Ranjard et al., 2013; Hermans et al., 2017). The main contributors to environmental  
354 associated variability in soil communities are differences in climatic conditions, topography, soil  
355 properties, and cultivation practices (Mezzasalma et al., 2018; Burns et al., 2015). Microbiome  
356 composition similarity analysis results did not show a clear clustering of vineyards according to their  
357 geographic location, indicating that even at a close geographic distance, environmental heterogeneity  
358 is the dominant factor shaping soil microbiome composition.

359 To determine which environmental factors contribute to the observed differences in soil microbial  
360 communities we used an automatic model building approach. This analysis revealed that when taken  
361 in combination, plant-available phosphorous and soil texture were the major contributors to soil  
362 microbiome differences between vineyards (approximately 20% of the total observed variability).  
363 Differences in plant-available phosphorous have been previously shown to impact microbial  
364 communities (Awasthi et al., 2011; Fierer and Jackson, 2006). In the studied vineyards, clay soils  
365 tended to show higher plant-available phosphorous content (Figure 4A & C), which is consistent with  
366 previous findings (Krogstad et al., 2005). Interestingly, soil particle size has been negatively correlated  
367 with microbiome community alpha diversity (Sessitsch et al., 2001) indicating that both variables could  
368 be affecting microbiome composition in an, at least partially, independent manner. Moreover, while  
369 genera *Streptomyces*, *Rubrobacter* (both Actinobacteria) and *unclassified MND1*, were especially  
370 prevalent in clay soils, genera *Streptomyces*, *Pseudomonas* and *unclassified Sinobacteraceae* were  
371 found in soils with plant-available phosphorous content higher than 30µg / g soil. *Pseudomonas*, are  
372 inorganic P solubilizing bacteria (Awasthi et al., 2011; Goswami et al., 2013; Schmalenberger and Fox,  
373 2016). Conversely, P levels negatively correlated with the abundance of the organic P mineralizing  
374 taxon OPB35. Pairwise analysis of individual taxa and environmental variables also identified  
375 previously reported strong and positive correlations between soil pH and order iii1-15 (acidobacteria-  
376 6) and family Pirellulaceae (Rousk et al., 2010; Hermans et al., 2017; Wu et al., 2017). Interestingly,  
377 both P and pH, have been shown to be soil variables that are indicative of anthropogenic activity  
378 (Hermans et al., 2017), which highlights the potential use of such taxa as reliable indicators of soil  
379 condition.

380 Previous studies have shown that climatic variables such as rainfall (Wildman, 2015) and temperature  
381 (Cong et al., 2015) are major shapers of soil microbial population composition and activity. Our results  
382 indicate that cooler and wetter regions (Western Ridge and Eden Valley) had relatively lower soil  
383 microbial diversity, and a higher ratio of dominant species, than the warmer and drier sites.  
384 Additionally, elevation, which negatively affects air temperature, showed a positive correlation with  
385 the families Isosphaeraceae and an unsurprising negative correlation with the thermophilic taxon  
386 Conexibacteraceae (Wagner and Wiegel, 2008).

387 Agricultural lands tend to show similar patterns of dominant bacteria (Burns et al. 2015; Liu et al.  
388 2014; Faoro et al. 2010; Lauber et al. 2009), indicating that microbial community composition can be  
389 profoundly affected by cropping practices (Hartman et al., 2018). Our results show that, both spacing  
390 between row and vine, which determine the vineyard's planting density, are significantly associated  
391 with global differences in soil microbial community. Work in oil palm plantations has shown that  
392 planting density affects soil bacteria by altering the level of solar light incidence on soils, which can  
393 have dramatic effects on soil temperature and moisture (Tripathi et al., 2016). Pairwise comparisons  
394 between agronomical practices and individual taxa showed a negative correlation between spacing  
395 among vines on the same row and the abundance of representatives of the Haliangiaceae family. These  
396 are mesophilic organisms previously identified to be sensitive to agricultural practices (e.g. (Ding et  
397 al., 2014; Kim and Liesack, 2015; Wang et al., 2016)), which abundance could be favored by lower  
398 soil temperatures in densely planted vineyards. This highlights the importance of temperature, shown  
399 above, in the formation of soil bacterial communities. However, vine density and the use of under-vine  
400 cover crops could also cause different levels of interactions between plant roots and soil microbes. This  
401 is particularly prominent when comparing sites with similar topography and soil texture, in which  
402 spatial patterns of soil biota are assumed to be structured primarily by plant growth, age, growth form  
403 and density (Ettema, 2002). Our results indicate that the abundance of taxa from the bacterial family  
404 Hyphomicrobiaceae is positively correlated with the vineyard age. Plant age has previously been linked  
405 to differences in soil bacterial communities in annual crops (Marques et al., 2014; Walters et al., 2018)  
406 and in wild plant species (Wagner et al., 2016; Na et al., 2017). However, how composition and  
407 diversity of rhizosphere communities shift with plant age in perennial, long-living crops has received  
408 less attention. No-till soil management has been shown to affect community composition (Lewis et al.,  
409 2018). It is therefore tempting to speculate that in perennial crops, the effect of plant age on soil  
410 bacterial communities, is the result of the prolonged presence of the crop.

### 411 **4.3 Correlations between soil bacterial communities and berry and wine parameters**

412 Berry parameters were found to be significantly associated with both the composition and diversity of  
413 soil microbiomes and with the abundance of single taxa. A total of six fruit traits correlated with  
414 differences in bacterial community composition and diversity, while one fruit trait was found  
415 significantly associated with the abundance of specific taxa. Plant-microbe interactions are known to  
416 modify the metabolome of *Arabidopsis thaliana* plants grown under controlled conditions (Badri et al.,  
417 2013), however, the modulating effect of soil microbiomes on the metabolome of commercial crops is  
418 unexplored. Unfortunately, the non-intervention nature of this research impedes us determining if the  
419 relationships observed between vineyard soil microbiomes and fruit traits are causal or simply mere  
420 correlations.

421 Soil microbiomes have previously been described as a contributor to the final sensory properties of  
422 wines by affecting wine fermentation. Grape must microbiota was found to be correlated to regional  
423 metabolite profiles and was suggested to be potential predictor for the abundance of wine metabolites  
424 (Bokulich et al., 2016). Here we identified 19 wine traits correlated with differences in bacterial

425 community composition and diversity, and seven correlated with the abundance of specific taxa.  
426 Vineyard soils may serve as a bacterial reservoir since bacterial communities associated with leaves,  
427 flowers, and grapes share a greater proportion of taxa with soil communities than with each other  
428 (Zarraonaindia et al., 2015). Unfortunately, the non-intervention nature of this research, the lack of  
429 replicability and the use of commercially produced wines, preclude us from determining if the  
430 relationships observed between vineyard soil microbiomes and fruit/wine traits are causal or simply  
431 mere correlations. Each of these wines was made commercially by different producers so there is  
432 potential for a certain level of winemaking effect.

## 433 **5 Conclusion**

434 Taken collectively our results show that geographic separation between vineyards contributes to  
435 bacterial community dissimilarities at a much smaller scale than previously reported. Environmental  
436 variables (e.g. climatic, topography, soil properties, and management practices) were the greatest  
437 contributor to such differences. Particularly, we found that soil variables are the major shapers of  
438 bacterial communities. Also, we show that variables highly affected by soil anthropogenisation (pH,  
439 plant available Phosphorous) and agricultural management variables (plant age, planting density) have  
440 strong correlations both with the community composition and diversity and the relative abundance of  
441 individual taxa. Finally, our results provide an important starting point for future studies investigating  
442 the potential influence of microbial communities on the metabolome of grapevines in general, and on  
443 the definition of local Terroirs. It will also be important to study a wider range of soil physicochemical  
444 properties, and vineyard floor vegetation, on the soil microbiome.

## 445 **6 Conflict of Interest**

446 *The authors declare that the research was conducted in the absence of any commercial or financial*  
447 *relationships that could be construed as a potential conflict of interest.*

## 448 **7 Author Contributions**

449 TRC, JRS, AM, MG, JB, CC and CMRL conceived and planned the experiments. CC and RDB  
450 contributed to the design of the research project, vineyard selection and fruit and wine chemical  
451 characterization. JZ conducted soil physicochemical analysis and the 16S rRNA gene laboratory work.  
452 JZ and TMN conducted the bioinformatics analysis. JZ and CMRL took the lead in writing the  
453 manuscript. All authors provided critical feedback and helped shape the research, analysis and  
454 manuscript.

## 455 **8 Funding**

456 This study was funded through a Pilot Program in Genomic Applications in Agriculture and  
457 Environment Sectors jointly supported by the University of Adelaide and the Australian Genome  
458 Research Facility Ltd. JZ was supported by an Adelaide Graduate Research Scholarship (University of  
459 Adelaide). CMRL was supported by a University of Adelaide Beacon Research Fellowship and is  
460 currently partially supported by the National Institute of Food and Agriculture, U.S. Department of  
461 Agriculture, Hatch Program number 2352987000. MG was supported by the Australian Research  
462 Council through Centre of Excellence (CE1400008) and Future Fellowship (FT130100709) funding.

## 463 **9 Acknowledgments**

464 The authors would like to gratefully acknowledge the Barossa Grounds Project and in particular the  
465 growers that allowed us to sample material from their properties and supplied information about their  
466 vineyards and management strategies. Dr. Kendall R. Corbin contributed to soil sample collection. We  
467 are thankful to Dr Hien To, Dr Steve Pederson and Dr Rick Tearle for assistance with data analysis.

468

## 469 **10 Data Availability Statement**

470 All the data and supporting information will be made available online.

471 1. Supplementary Figures S1-S3.

472 2. Supplementary Tables S1-S11.

473 The data that support the findings of this study are openly available in NCBI Sequence Read Archive  
474 (accession number: PRJNA601984).

475

## 476 **11 References**

477 Awasthi, R., Tewari, R., and Nayyar, H. (2011). Synergy between plants and P-solubilizing microbes  
478 in soils: effects on growth and physiology of crops. *International Research Journal of*  
479 *Microbiology* 2, 484–503.

480 Badri, D. V., Zolla, G., Bakker, M. G., Manter, D. K., and Vivanco, J. M. (2013). Potential impact of  
481 soil microbiomes on the leaf metabolome and on herbivore feeding behavior. *New Phytologist*  
482 198, 264–273. doi:10.1111/nph.12124.

483 Barata, A., Malfeito-Ferreira, M., and Loureiro, V. (2012). The microbial ecology of wine grape  
484 berries. *International Journal of Food Microbiology* 153, 243–259.  
485 doi:10.1016/j.ijfoodmicro.2011.11.025.

486 Bates, S. T., Berg-Lyons, D., Caporaso, J. G., Walters, W. A., Knight, R., and Fierer, N. (2011).  
487 Examining the global distribution of dominant archaeal populations in soil. *ISME Journal* 5,  
488 908–917. doi:10.1038/ismej.2010.171.

489 Bokulich, N. A., Collins, T. S., Masarweh, C., Allen, G., Heymann, H., Ebeler, S. E., and Mills, D. A.  
490 (2016). Associations among wine grape microbiome, metabolome, and fermentation behavior  
491 suggest microbial contribution to regional wine characteristics. *MBio* 7.  
492 doi:10.1128/mBio.00631-16.

493 Broeckling, C. D., Broz, A. K., Bergelson, J., Manter, D. K., and Vivanco, J. M. (2008). Root exudates  
494 regulate soil fungal community composition and diversity. *Applied and Environmental*  
495 *Microbiology* 74, 738–744. doi:10.1128/AEM.02188-07.

496 Burns, K. N., Kluepfel, D. A., Strauss, S. L., Bokulich, N. A., Cantu, D., and Steenwerth, K. L. (2015).  
497 Vineyard soil bacterial diversity and composition revealed by 16S rRNA genes: Differentiation

- 498 by geographic features. *Soil Biology and Biochemistry* 91, 232–247.  
499 doi:10.1016/j.soilbio.2015.09.002.
- 500 Bushnell, B. (2016). BBMerge guide. Available at:  
501 <http://gensoft.pasteur.fr/docs/bbmap/36.11/BBMergeGuide.txt> [Accessed October 3, 2016].
- 502 Da C Jesus, E., Marsh, T. L., Tiedje, J. M., and de S Moreira, F. M. (2009). Changes in land use alter  
503 the structure of bacterial communities in Western Amazon soils. *ISME Journal* 3, 1004–1011.  
504 doi:10.1038/ismej.2009.47.
- 505 Caporaso, J. G., Bittinger, K., Bushman, F. D., DeSantis, T. Z., Andersen, G. L., and Knight, R. (2010).  
506 PyNAST: a flexible tool for aligning sequences to a template alignment. *Bioinformatics* 26,  
507 266–267. doi:10.1093/bioinformatics/btp636.
- 508 Caporaso, J. G., Lauber, C. L., Walters, W. A., Berg-Lyons, D., Lozupone, C. A., Turnbaugh, P. J.,  
509 Fierer, N., and Knight, R. (2011). Global patterns of 16S rRNA diversity at a depth of millions  
510 of sequences per sample. *Proceedings of National Academy of Sciences of the United States of*  
511 *America* 108 Suppl 1, 4516–4522. doi:10.1073/pnas.1000080107.
- 512 Castro, H. F., Classen, A. T., Austin, E. E., Norby, R. J., and Schadt, C. W. (2010). Soil microbial  
513 community responses to multiple experimental climate change drivers. *Applied and*  
514 *Environmental Microbiology* 76, 999–1007. doi:10.1128/AEM.02874-09.
- 515 Cavagnaro T. R. (2016). Life at the interface: above- and below-ground responses of a grazed pasture  
516 soil to reforestation. *Applied Soil Ecology* 100, 27-37. doi:10.1016/j.apsoil.2015.12.002
- 517 Chen, Y., McCarthy, D., Ritchie, M., Robinson, M., and K.Smyth, G. (2008). *EdgeR:differential*  
518 *expression analysis of digital gene expression data user's guide*. 1st ed.
- 519 Compant, S., Mitter, B., Colli-Mull, J. G., Gangl, H., and Sessitsch, A. (2011). Endophytes of  
520 grapevine flowers, berries, and seeds: identification of cultivable bacteria, comparison with  
521 other plant parts, and visualization of niches of colonization. *Microbial Ecology* 62, 188–197.  
522 doi:10.1007/s00248-011-9883-y.
- 523 Cong, J., Yang, Y., Liu, X., Lu, H., Liu, X., Zhou, J., Li, D., Yin, H., Ding, J., and Zhang, Y. (2015).  
524 Analyses of soil microbial community compositions and functional genes reveal potential  
525 consequences of natural forest succession. *Scientific Reports* 5, 10007.  
526 doi:10.1038/srep10007.
- 527 Crowder, D. W., Northfield, T. D., Strand, M. R., and Snyder, W. E. (2010). Organic agriculture  
528 promotes evenness and natural pest control. *Nature* 466, 109–112. doi:10.1038/nature09183.
- 529 DeSantis, T. Z., Hugenholtz, P., Larsen, N., Rojas, M., Brodie, E. L., Keller, K., Huber, T., Dalevi, D.,  
530 Hu, P., and Andersen, G. L. (2006). Greengenes, a chimera-checked 16S rRNA gene database  
531 and workbench compatible with ARB. *Applied Environmental Microbiology* 72, 5069–5072.  
532 doi:10.1128/AEM.03006-05.
- 533 Dias, A. C. F., Dini-Andreote, F., Hannula, S. E., Andreote, F. D., Pereira E Silva, M. de C., Salles, J.  
534 F., de Boer, W., van Veen, J., and van Elsas, J. D. (2013). Different selective effects on  
535 rhizosphere bacteria exerted by genetically modified versus conventional potato lines. *PLoS*

- 536 *ONE* 8, e67948. doi:10.1371/journal.pone.0067948.
- 537 Ding, G.-C., Radl, V., Schloter-Hai, B., Jechalke, S., Heuer, H., Smalla, K., and Schloter, M. (2014).  
538 Dynamics of soil bacterial communities in response to repeated application of manure  
539 containing sulfadiazine. *PLoS ONE* 9, e92958. doi:10.1371/journal.pone.0092958.
- 540 Giddings, J. A. (2015). Determining soil texture using the ribboning technique. NSW Department of  
541 Primary Industries. Primefact 1363. 10.1314/RG.2.1.3876.6809.
- 542 Edgar, R. C. (2010). Search and clustering orders of magnitude faster than BLAST. *Bioinformatics* 26,  
543 2460–2461. doi:10.1093/bioinformatics/btq461.
- 544 Edwards, J., Porter, I., Riches, D., Oliver, D., Bramley, R., Rawnsley, B., and White, B. (2014). Soil  
545 Biology: Choosing biological indicators for monitoring vineyard soil quality. *Wine &*  
546 *Viticulture Journal* 29, 48.
- 547 Ettema, C. (2002). Spatial soil ecology. *Trends in Ecology & Evolution* 17, 177–183.  
548 doi:10.1016/S0169-5347(02)02496-5.
- 549 Faith, D. P. (1992). Conservation evaluation and phylogenetic diversity. *Biological Conservation* 61,  
550 1–10. doi:10.1016/0006-3207(92)91201-3.
- 551 Faoro, H., Alves, A. C., Souza, E. M., Rigo, L. U., Cruz, L. M., Al-Janabi, S. M., Monteiro, R. A.,  
552 Baura, V. A., and Pedrosa, F. O. (2010). Influence of soil characteristics on the diversity of  
553 bacteria in the Southern Brazilian Atlantic Forest. *Applied and Environmental Microbiology*  
554 76, 4744–4749. doi:10.1128/AEM.03025-09.
- 555 Fierer, N. (2008). “Microbial biogeography: patterns in microbial diversity across space and time,” in  
556 *Assessing Uncultivated Microorganisms*, ed. K. Zengler. *American Society of Microbiology*  
557 95–115. doi:10.1128/9781555815509.ch6.
- 558 Fierer, N., and Jackson, R. B. (2006). The diversity and biogeography of soil bacterial communities.  
559 *Proceedings of the National Academy of Sciences of the United States of America* 103, 626–  
560 631. doi:10.1073/pnas.0507535103.
- 561 Frey, S. D., Knorr, M., Parrent, J. L., and Simpson, R. T. (2004). Chronic nitrogen enrichment affects  
562 the structure and function of the soil microbial community in temperate hardwood and pine  
563 forests. *Forest Ecology and Management* 196, 159–171.
- 564 Girvan, M. S., Bullimore, J., Pretty, J. N., Osborn, A. M., and Ball, A. S. (2003). Soil type is the primary  
565 determinant of the composition of the total and active bacterial communities in arable soils.  
566 *Applied and Environmental Microbiology* 69, 1800–1809.
- 567 Goswami, D., Vaghela, H., Parmar, S., Dhandhukia, P. and Thakker, J.N. (2013). Plant growth  
568 promoting potentials of *Pseudomonas* spp. strain OG isolated from marine water. *Journal of*  
569 *Plant Interactions* 8, 281-290. doi:10.1080/17429145.2013.768360
- 570 Hartman, K., van der Heijden, M. G. A., Wittwer, R. A., Banerjee, S., Walser, J.-C., and Schlaeppli, K.  
571 (2018). Cropping practices manipulate abundance patterns of root and soil microbiome  
572 members paving the way to smart farming. *Microbiome* 6, 14. doi:10.1186/s40168-017-0389-

- 573 9.
- 574 Hermans, S. M., Buckley, H. L., Case, B. S., Curran-Cournane, F., Taylor, M., and Lear, G. (2017).  
575 Bacteria as emerging indicators of soil condition. *Applied and Environmental Microbiology* 83.  
576 doi:10.1128/AEM.02826-16.
- 577 Fabres, P., Collins, C., Cavagnaro, T. R., and Rodríguez López, C. M. (2017). A Concise review on  
578 multi-omics data integration for *terroir* analysis in *Vitis vinifera*. *Frontiers in Plant Science* 8,  
579 1065. doi:10.3389/fpls.2017.01065.
- 580 Kim, Y., and Liesack, W. (2015). Differential assemblage of functional units in paddy soil  
581 microbiomes. *PLoS ONE* 10, e0122221. doi:10.1371/journal.pone.0122221.
- 582 Krogstad, T., Sogn, T. A., Asdal, Å., and Sæbø, A. (2005). Influence of chemically and biologically  
583 stabilized sewage sludge on plant-available phosphorous in soil. *Ecological Engineering* 25,  
584 51–60. doi:10.1016/j.ecoleng.2005.02.009.
- 585 Lamb, E. G., Kennedy, N., and Siciliano, S. D. (2011). Effects of plant species richness and evenness  
586 on soil microbial community diversity and function. *Plant and Soil* 338, 483–495.  
587 doi:10.1007/s11104-010-0560-6.
- 588 Lauber, C. L., Hamady, M., Knight, R., and Fierer, N. (2009). Pyrosequencing-based assessment of  
589 soil pH as a predictor of soil bacterial community structure at the continental scale. *Applied and*  
590 *Environmental Microbiology* 75, 5111–5120. doi:10.1128/AEM.00335-09.
- 591 Lewis, R., Barth, V., Coffey, T., McFarland, C., Huggins, D., and Sullivan, T. (2018). Altered bacterial  
592 communities in long-term no-till soils associated with stratification of soluble aluminum and  
593 soil pH. *Soil Systems* 2, 7. doi:10.3390/soils2010007.
- 594 Liu, J., Sui, Y., Yu, Z., Shi, Y., Chu, H., Jin, J., Liu, X., and Wang, G. (2014). High throughput  
595 sequencing analysis of biogeographical distribution of bacterial communities in the black soils  
596 of northeast China. *Soil Biology and Biochemistry* 70, 113–122.  
597 doi:10.1016/j.soilbio.2013.12.014.
- 598 Lozupone, C., and Knight, R. (2005). UniFrac: a new phylogenetic method for comparing microbial  
599 communities. *Applied and Environmental Microbiology* 71, 8228–8235.  
600 doi:10.1128/AEM.71.12.8228-8235.2005.
- 601 Lumini, E., Vallino, M., Alguacil, M. M., Romani, M., and Bianciotto, V. (2011). Different farming  
602 and water regimes in Italian rice fields affect arbuscular mycorrhizal fungal soil communities.  
603 *Ecological Applications* 21, 1696–1707. doi:10.1890/10-1542.1.
- 604 Marques, J. M., da Silva, T. F., Vollu, R. E., Blank, A. F., Ding, G.-C., Seldin, L., and Smalla, K.  
605 (2014). Plant age and genotype affect the bacterial community composition in the tuber  
606 rhizosphere of field-grown sweet potato plants. *FEMS Microbiology Ecology* 88, 424–435.  
607 doi:10.1111/1574-6941.12313.
- 608 Martins, G., Lauga, B., Miot-Sertier, C., Mercier, A., Lonvaud, A., Soulas, M.-L., Soulas, G., and  
609 Masneuf-Pomarède, I. (2013). Characterization of epiphytic bacterial communities from  
610 grapes, leaves, bark and soil of grapevine plants grown, and their relations. *PLoS ONE* 8,

- 611 e73013. doi:10.1371/journal.pone.0073013.
- 612 McDonald, D., Price, M. N., Goodrich, J., Nawrocki, E. P., DeSantis, T. Z., Probst, A., Andersen, G.  
613 L., Knight, R., and Hugenholtz, P. (2012). An improved Greengenes taxonomy with explicit  
614 ranks for ecological and evolutionary analyses of bacteria and archaea. *ISME Journal* 6, 610–  
615 618. doi:10.1038/ismej.2011.139.
- 616 Mezzasalma, V., Sandionigi, A., Guzzetti, L., Galimberti, A., Grando, M. S., Tardaguila, J., and Labra,  
617 M. (2018). Geographical and cultivar features differentiate grape microbiota in Northern Italy  
618 and Spain vineyards. *Frontiers in Microbiology* 9, 946. doi:10.3389/fmicb.2018.00946.
- 619 Mira de Orduña, R. (2010). Climate change associated effects on grape and wine quality and  
620 production. *Food Research International* 43, 1844–1855. doi:10.1016/j.foodres.2010.05.001.
- 621 Miura, T., Sánchez, R., Castañeda, L. E., Godoy, K., and Barbosa, O. (2017). Is microbial terroir related  
622 to geographic distance between vineyards? *Environmental Microbiology Reports* 9, 742–749.  
623 doi:10.1111/1758-2229.12589.
- 624 Na, X., Li, X., Zhang, Z., Li, M., Kardol, P., Xu, T. T., Wang, M., Cao, X., and Ma, F. (2017). Bacterial  
625 community dynamics in the rhizosphere of a long-lived, leguminous shrub across a 40-year age  
626 sequence. *Journal of Soils and Sediments* 18, 1–9. doi:10.1007/s11368-017-1745-x.
- 627 Nannipieri, P., Ascher, J., Ceccherini, M. T., Landi, L., Pietramellara, G., and Renella, G. (2003).  
628 Microbial diversity and soil functions. *European Journal of Soil Science* 54, 655–670.  
629 doi:10.1046/j.1351-0754.2003.0556.x.
- 630 Navas-Molina, J. A., Peralta-Sánchez, J. M., González, A., McMurdie, P. J., Vázquez-Baeza, Y., Xu,  
631 Z., Ursell, L. K., Lauber, C., Zhou, H., Song, S. J., et al. (2013). Advancing our understanding  
632 of the human microbiome using QIIME. *Methods in Enzymology* 531, 371–444.  
633 doi:10.1016/B978-0-12-407863-5.00019-8.
- 634 Oksanen, J., Blanchet, F.G., Kindt, R., Legendre, P., Minchin, P.R., O'hara, R.B., Simpson, G.L.,  
635 Solymos, P., H. Stevens, M.H., and Wagner, H. (2013). Package “vegan.” *Community Ecology*  
636 *Package 2, 1-295*
- 637 Parks, D. H., Mankowski, T., Zangooui, S., Porter, M. S., Armanini, D. G., Baird, D. J., Langille, M.  
638 G. I., and Beiko, R. G. (2013). GenGIS 2: geospatial analysis of traditional and genetic  
639 biodiversity, with new gradient algorithms and an extensible plugin framework. *PLoS ONE* 8,  
640 e69885. doi:10.1371/journal.pone.0069885.
- 641 Parks, D. H., Porter, M., Churcher, S., Wang, S., Blouin, C., Whalley, J., Brooks, S., and Beiko, R. G.  
642 (2009). GenGIS: a geospatial information system for genomic data. *Genome Research* 19,  
643 1896–1904. doi:10.1101/gr.095612.109.
- 644 Peakall, R., and Smouse, P. E. (2012). GenAIEx 6.5: genetic analysis in Excel. Population genetic  
645 software for teaching and research-an update. *Bioinformatics* 28, 2537–2539.  
646 doi:10.1093/bioinformatics/bts460.
- 647 Philippot, L., Raaijmakers, J. M., Lemanceau, P., and van der Putten, W. H. (2013). Going back to the  
648 roots: the microbial ecology of the rhizosphere. *Nature Reviews. Microbiology* 11, 789–799.



- 649           doi:10.1038/nrmicro3109.
- 650   Ranjard, L., Dequiedt, S., Chemidlin Prévost-Bouré, N., Thioulouse, J., Saby, N. P. A., Lelievre, M.,  
651           Maron, P. A., Morin, F. E. R., Bispo, A., Jolivet, C., et al. (2013). Turnover of soil bacterial  
652           diversity driven by wide-scale environmental heterogeneity. *Nature Communications* 4, 1434.  
653           doi:10.1038/ncomms2431.
- 654   Rayment, G. E., and Higginson, F. R. (1992). *Australian laboratory handbook of soil and water*  
655           *chemical methods*. Inkata Press Pty Ltd.
- 656   Reeve, J. R., Schadt, C. W., Carpenter-Boggs, L., Kang, S., Zhou, J., and Reganold, J. P. (2010). Effects  
657           of soil type and farm management on soil ecological functional genes and microbial activities.  
658           The *ISME Journal* 4, 1099–1107. doi:10.1038/ismej.2010.42.
- 659   Robinson, S., and Sandercock, N. (2014). An analysis of climate, soil and topographic information to  
660           aid the understanding of barossa terroir. Adelaide, Australia: SA: Primary Industries and  
661           Regions South Australia.
- 662   Romero, P., Fernandez-Fernandez, J., and Botia Ordaz, P. (2016). Interannual climatic variability  
663           effects on yield, berry and wine quality indices in long-term deficit irrigated grapevines,  
664           determined by multivariate analysis. *International Journal of Wine Research* 8, 3–17.  
665           doi:10.2147/IJWR.S107312.
- 666   Rousk, J., Bååth, E., Brookes, P. C., Lauber, C. L., Lozupone, C., Caporaso, J. G., Knight, R., and  
667           Fierer, N. (2010). Soil bacterial and fungal communities across a pH gradient in an arable soil.  
668           The *ISME Journal* 4, 1340–1351. doi:10.1038/ismej.2010.58.
- 669   Schmalenberger, A., and Fox, A. (2016). Bacterial mobilization of nutrients from biochar-amended  
670           soils. *Advances in Applied Microbiology* 94, 109–159. doi:10.1016/bs.aambs.2015.10.001.
- 671   Sessitsch, A., Weilharter, A., Gerzabek, M. H., Kirchmann, H., and Kandeler, E. (2001). Microbial  
672           population structures in soil particle size fractions of a long-term fertilizer field experiment.  
673           *Applied and Environmental Microbiology* 67, 4215–4224. doi:10.1128/AEM.67.9.4215-  
674           4224.2001.
- 675   Sugiyama, A., Vivanco, J. M., Jayanty, S. S., and Manter, D. K. (2010). Pyrosequencing assessment  
676           of soil microbial communities in organic and conventional potato farms. *Plant disease* 94,  
677           1329–1335. doi:10.1094/PDIS-02-10-0090.
- 678   Team, R. C. (2013). R: A language and environment for statistical computing.
- 679   Tripathi, B. M., Edwards, D. P., Mendes, L. W., Kim, M., Dong, K., Kim, H., and Adams, J. M. (2016).  
680           The impact of tropical forest logging and oil palm agriculture on the soil microbiome.  
681           *Molecular Ecology* 25, 2244–2257. doi:10.1111/mec.13620.
- 682   Van Leeuwen, C., Friant, P., Chone, X., Tregoat, O., Koundouras, S., and Dubourdieu, D. (2004).  
683           Influence of climate, soil, and cultivar on terroir. *American Journal of Enology and Viticulture*  
684           55, 207-217. doi: ajevonline.org/cgi/reprint/55/3/207
- 685   Vázquez-Baeza, Y., Pirrung, M., Gonzalez, A., and Knight, R. (2013). EMPeror: a tool for visualizing

- 686 high-throughput microbial community data. *Gigascience* 2, 1. doi: 10.1186/2047-217X-2-16.
- 687 Vega-Avila, A. D., Gumiere, T., Andrade, P. A. M., Lima-Perim, J. E., Durrer, A., Baigori, M.,  
688 Vazquez, F., and Andreote, F. D. (2015). Bacterial communities in the rhizosphere of *Vitis*  
689 *vinifera* L. cultivated under distinct agricultural practices in Argentina. *Antonie Van*  
690 *Leeuwenhoek* 107, 575–588. doi:10.1007/s10482-014-0353-7.
- 691 Wagner, I. D., and Wiegel, J. (2008). Diversity of thermophilic anaerobes. *Annals of the New York*  
692 *Academy of Sciences* 1125, 1–43. doi:10.1196/annals.1419.029.
- 693 Wagner, M. R., Lundberg, D. S., Del Rio, T. G., Tringe, S. G., Dangl, J. L., and Mitchell-Olds, T.  
694 (2016). Host genotype and age shape the leaf and root microbiomes of a wild perennial plant.  
695 *Nature Communications* 7, 12151. doi:10.1038/ncomms12151.
- 696 Walters, W. A., Jin, Z., Youngblut, N., Wallace, J. G., Sutter, J., Zhang, W., González-Peña, A., Peiffer,  
697 J., Koren, O., Shi, Q., et al. (2018). Large-scale replicated field study of maize rhizosphere  
698 identifies heritable microbes. *Proceedings of the National Academy of Sciences of the United*  
699 *States of America* 115, 7368–7373. doi:10.1073/pnas.1800918115.
- 700 Wang, Q., Garrity, G. M., Tiedje, J. M., and Cole, J. R. (2007). Naive Bayesian classifier for rapid  
701 assignment of rRNA sequences into the new bacterial taxonomy. *Applied and Environmental*  
702 *Microbiology* 73, 5261–5267. doi:10.1128/AEM.00062-07.
- 703 Wang, W., Wang, H., Feng, Y., Wang, L., Xiao, X., Xi, Y., Luo, X., Sun, R., Ye, X., Huang, Y., et al.  
704 (2016). Consistent responses of the microbial community structure to organic farming along  
705 the middle and lower reaches of the Yangtze River. *Scientific Reports* 6, 35046.  
706 doi:10.1038/srep35046.
- 707 Weckert, M. (2016). Soil microbiology: Vineyard terroir – is there a link with soil microbiology? *Wine*  
708 *& Viticulture Journal* 31, 39-40.
- 709 Wildman, H. (2015). Improving mine rehabilitation success through microbial management. *Journal*  
710 *of Environmental Solutions for Oil, Gas, and Mining* 1, 32–46. doi:10.3992/1573-2377-374X-  
711 1.1.32.
- 712 Wittebolle, L., Marzorati, M., Clement, L., Balloi, A., Daffonchio, D., Heylen, K., De Vos, P.,  
713 Verstraete, W., and Boon, N. (2009). Initial community evenness favours functionality under  
714 selective stress. *Nature* 458, 623–626. doi:10.1038/nature07840.
- 715 Wolf, T. K., Dry, P. R., Iland, P. G., Botting, D., Dick, J., Kennedy, U., and Ristic, R. (2003). Response  
716 of Shiraz grapevines to five different training systems in the Barossa Valley, Australia.  
717 *Australian Journal of Grape and Wine Research* 9, 82–95.
- 718 Wu, Y., Zeng, J., Zhu, Q., Zhang, Z., and Lin, X. (2017). pH is the primary determinant of the bacterial  
719 community structure in agricultural soils impacted by polycyclic aromatic hydrocarbon  
720 pollution. *Scientific Reports* 7, 40093. doi:10.1038/srep40093.
- 721 Xie, H., Konate, M., Sai, N., Tesfamicael, K. G., Cavagnaro, T., Gilliam, M., Breen, J., Metcalfe, A.,  
722 DeBei, R., Collins, C., et al. (2017). Environmental conditions and agronomic practices induce  
723 consistent global changes in DNA methylation patterns in grapevine (*Vitis vinifera* cv Shiraz).

724

*BioRxiv*. doi:10.1101/127977.

725 Zarraonaindia, I., Owens, S. M., Weisenhorn, P., West, K., Hampton-Marcell, J., Lax, S., Bokulich, N.  
 726 A., Mills, D. A., Martin, G., Taghavi, S., et al. (2015). The soil microbiome influences  
 727 grapevine-associated microbiota. *mBio* 6. doi:10.1128/mBio.02527-14.

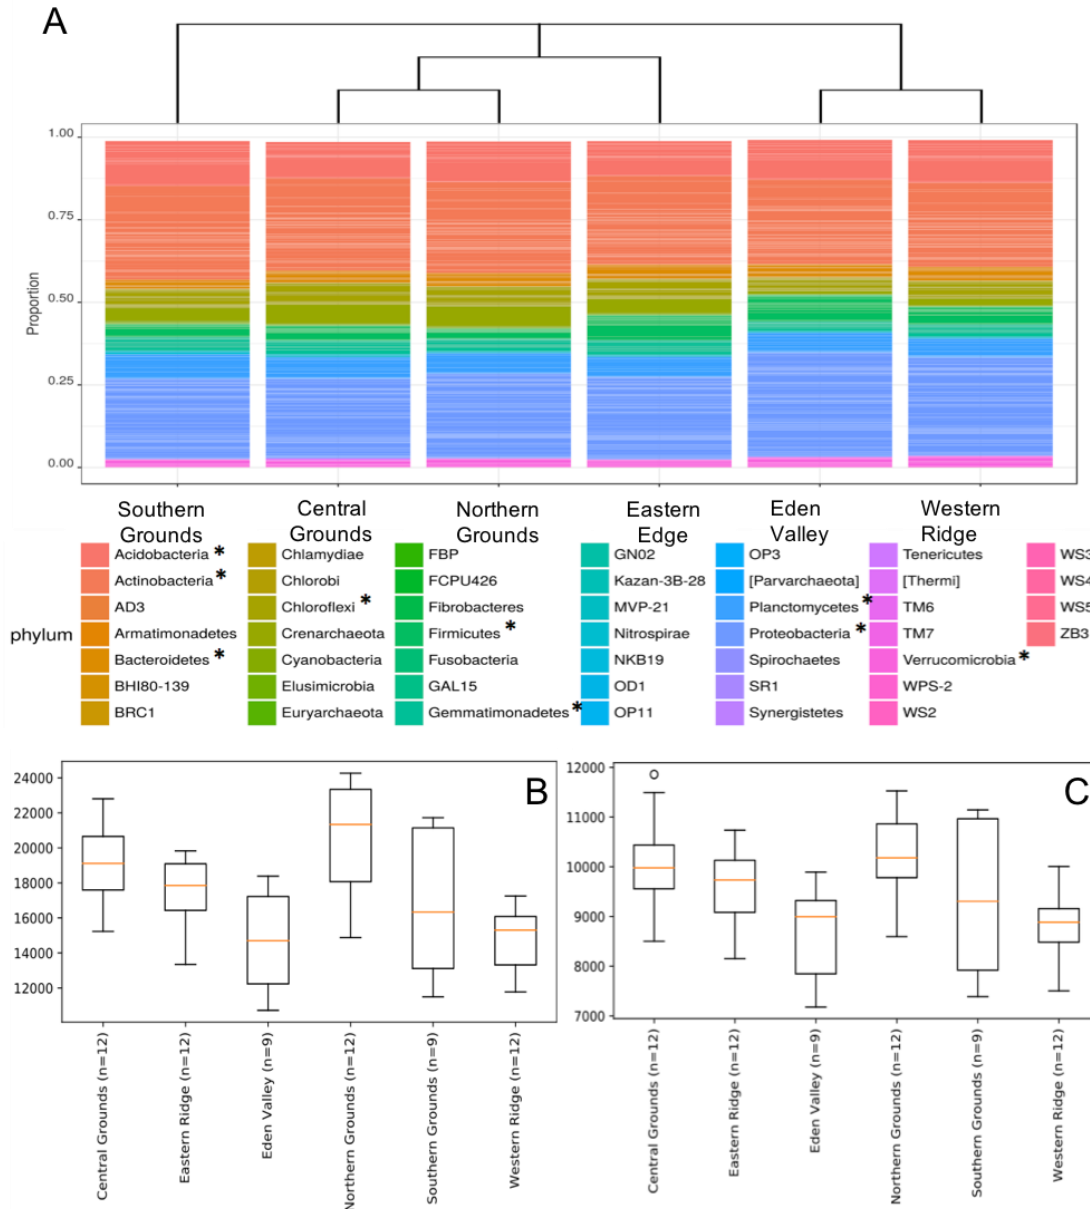

728

729 **Figure 1. Soil bacteria community composition and diversity in 6 Barossa sub-regions. A)**

730 Phylogenetic inference of microbiome composition differences between Barossa sub-regions.

731 Neighbour joining tree was generated with weighted UniFrac distances calculated with sequences

732 classifiable at the phylum level (98.9% of total). 96.5% of all sequences were assigned to one of nine

733 main dominant groups (relative abundance  $\geq 1.0\%$ ) (indicated here by \*). **B)** Alpha diversity: Chao1  
734 diversity comparison, **C)** and observed species diversity comparison. Alpha diversity values were  
735 calculated based on rarefied data was established using 16S sequencing reads from 3 soil samples per  
736 vineyard.

737

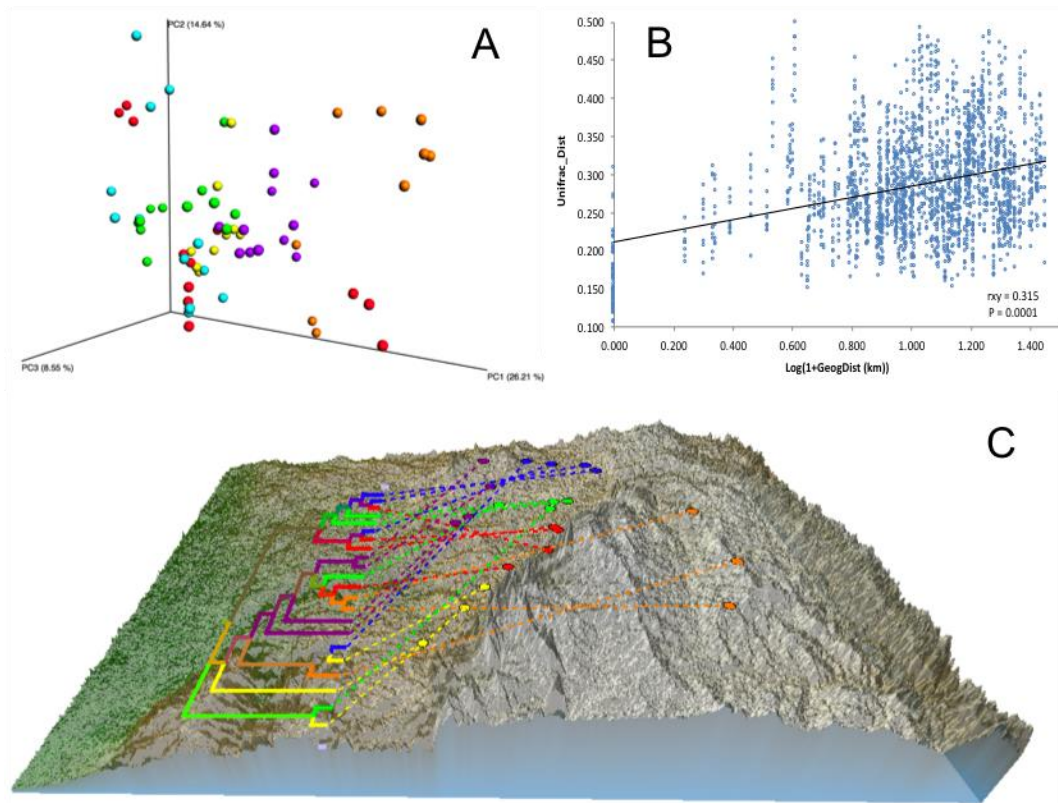

738

739 **Figure 2. Effect of vineyard location on soil microbiome differentiation.** **A)** PCoA based on Beta  
740 diversity of soil bacterial communities calculated using weighted UniFrac distances. Values were  
741 calculated based on rarefied data to 37,176 sequences per sample. **B)** Relationship between  
742 phylogenetic Beta diversity and geographic distance. Unifrac\_dist indicates weighted UniFrac  
743 distances. Geographic distances were calculated from latitude/longitude coordinates using GenAlex  
744 v6.5 *geographic distance* function implemented as  $\text{Log}(1+\text{distances in Kilometres})$ . The relationship  
745 was tested using Mantel's correlation coefficient (rxy) with its probability estimate for significance (P)

746 based on 9,999 random permutations and implemented using GenAlex v6.5. C) Neighbour joining  
747 ultrametric tree calculated from Beta diversity weighted UniFrac distance matrix between 22 vineyards  
748 located in six sub-regions: Northern Grounds (blue); Southern Grounds (yellow); Central Grounds  
749 (green); Eastern Edge (red); Western Ridge (purple); Eden Valley (orange). Tree was overlaid with  
750 the Barossa Region elevation map using GenGIS. Beta diversity was established using 16S sequencing  
751 reads from 3 soil samples per vineyard.

752

753

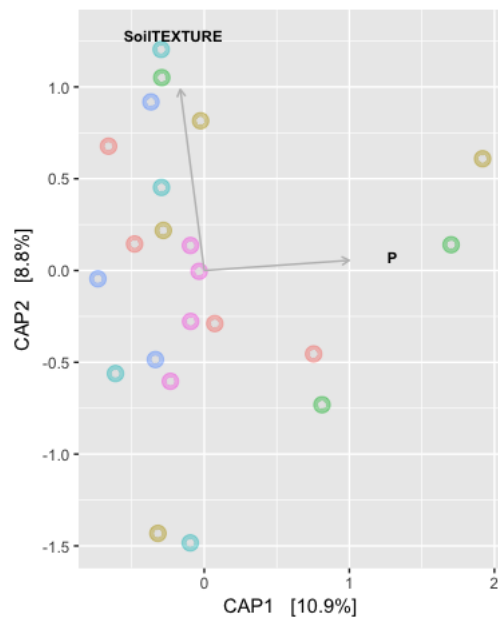

754

755 **Figure 3. Main drivers of soil microbiome differentiation between Barossa Region vineyards.** The  
756 observed important soil factors that affect soil microbial community groups in combinations. CAP plot  
757 displays the combination of variables that explained the greatest variation in the soil microbiome  
758 through model selection (full results Table 1). The correlation test was carried out on environmental  
759 variables following the removal of the highly correlated variables ( $>0.85$ ) using the function *ordisten*,  
760 in the package *Vegan*. The variables implemented in the final model were soil phosphorous and soil  
761 texture, which explained 19.7% of variation in the soil microbiome. Distance based redundancy  
762 analysis (dbRDA) with Bray-Curtis dissimilarity matrix of OTUs was used to examine the influence  
763 of these predictor variables using the function *capscale* in the package *Vegan* in R.

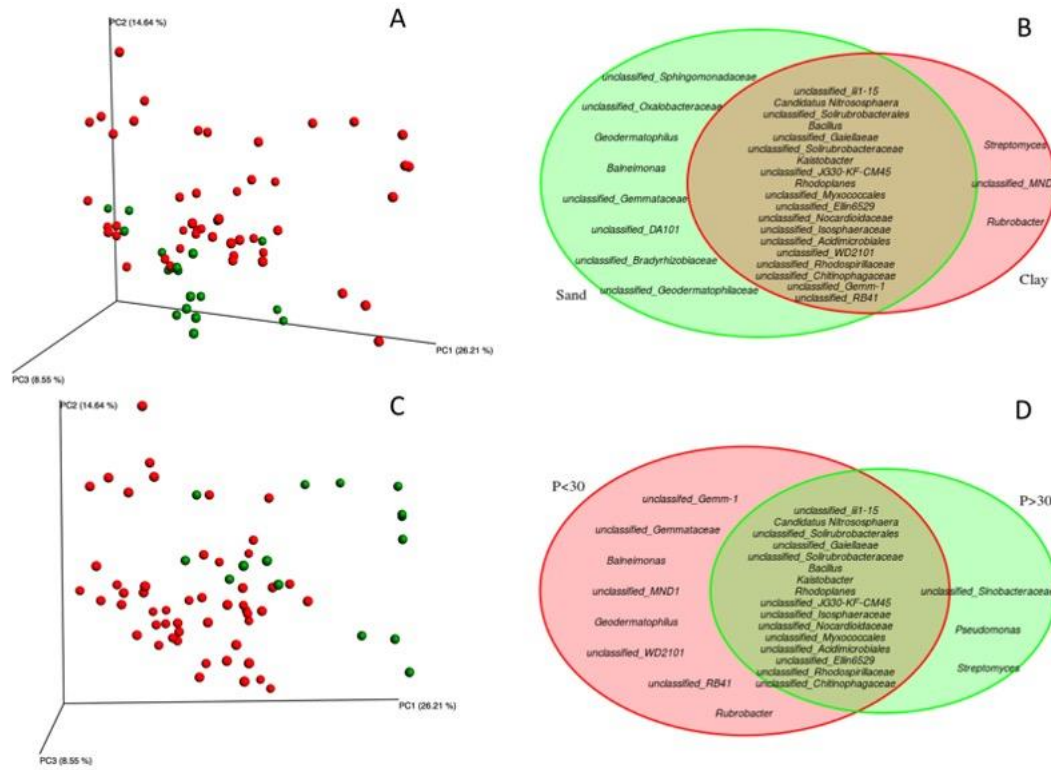

764

765 **Figure 4. Identification of microbial genera associated to soil texture and plant-available**  
 766 **phosphorous in Barossa Region vineyards.** Principal coordinate analysis plots display weighted  
 767 UniFrac distances of soil samples from 22 vineyards in six sub-regions of Barossa Valley. Venn  
 768 Diagrams show significantly different ( $P > 0.01$ ) genera. Plots and diagrams are grouped by (A/B) soil  
 769 type (clay (red) versus sandy soils (green)), and (C/D) plant-available Phosphorous (P) ( $P < 30 \mu\text{g P} /$   
 770  $\text{g soil}$  (red),  $P > 30 \mu\text{g P} / \text{g soil}$  (green)). Beta diversity was established using 16S sequencing reads  
 771 from 3 soil samples per vineyard.

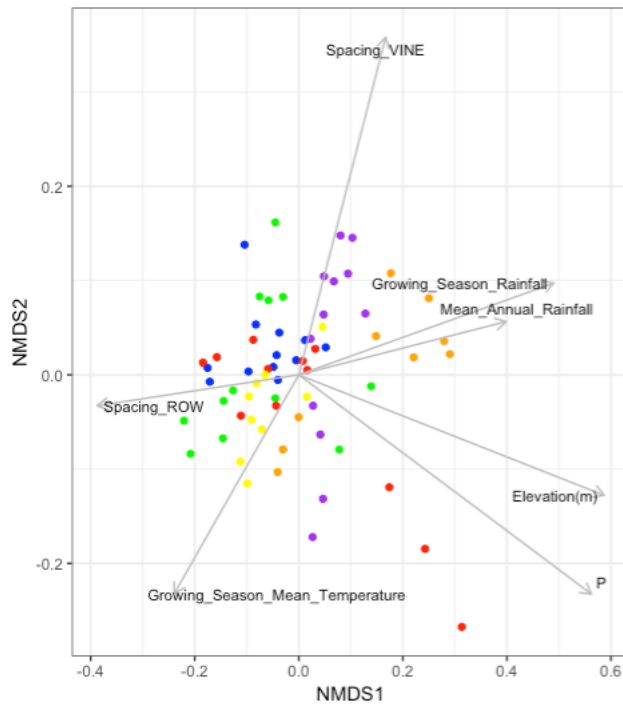

772

773 **Figure 5. Environmental and vineyard management factors significantly associated with soil**  
774 **microbial community composition in Barossa Region vineyards.** Non-metric multidimensional  
775 scaling plot displays the microbial community composition of 22 vineyards located in six sub-regions:  
776 Northern Grounds (blue); Southern Grounds (yellow); Central Grounds (green); Eastern Edge (red);  
777 Western Ridge (purple); Eden Valley (orange). Vector arrows indicate the association with  
778 environmental variables with  $p$ -value  $< 0.05$ . Arrow heads indicate the direction and length indicates  
779 the strength of the variable and nMDS correlation. Analysis was conducted using 999 permutations  
780 with variables deemed significant where  $p$ -value  $< 0.05$ .

781

782

783

784



785 **Table 1. Main drivers of soil microbiome differentiation between Barossa Region vineyards.**  
786 Variables that explained the greatest variation in the soil microbiome through model selection. The  
787 correlation test was carried out on environmental variables following the removal of the highly  
788 correlated variables (>0.85) using the function *ordisten*, in the package *Vegan*.

| Step         | Df | Deviance | Resid. Df | Resid. Dev | AIC      |
|--------------|----|----------|-----------|------------|----------|
| 1            | NA | NA       | 21        | 75.29566   | 29.06836 |
| Soil P       | -1 | 8.170918 | 20        | 67.12475   | 28.54123 |
| Soil texture | -1 | 6.620899 | 19        | 60.50386   | 28.25662 |

789

790

791

792

793

794

795

796

797

798

799

800

801

802

803 **Table 2. Fruit and wine characteristics significantly associated with microbial community**  
 804 **composition in Barossa Region vineyards.** Table shows the *envfit* output that was carried out the  
 805 correlation test between grape and wine characteristics variables that fitted onto an ordination of  
 806 nonmetric multidimensional scaling (nMDS) plots of microbial community data from soils in 22  
 807 vineyard sites. Analysis was conducted using 999 permutations with variables deemed significant  
 808 where p-value < 0.05.

| Variables                     |                                | NMDS1          | NMDS2          | r2            | Pr(>r)         |
|-------------------------------|--------------------------------|----------------|----------------|---------------|----------------|
| <b>Basic berry properties</b> | 50 berries weight              | -0.87544       | -0.48332       | 0.1612        | 0.008**        |
|                               | TA berry                       | 0.9369         | 0.3496         | 0.1119        | 0.029*         |
|                               | Average colour                 | 0.76859        | 0.63974        | 0.1337        | 0.008**        |
|                               | Average total phenolics berry  | 0.76558        | 0.64334        | 0.135         | 0.015*         |
|                               | Malic acid                     | -0.90493       | 0.42557        | 0.104         | 0.03*          |
| <b>Basic wine chemistry</b>   | Total phenolics                | <b>0.83761</b> | <b>0.54627</b> | <b>0.2132</b> | <b>0.002**</b> |
|                               | Total anthocyanins             | 0.99519        | 0.09801        | 0.2507        | 0.001***       |
|                               | Colour density (so2 corrected) | 0.72894        | 0.68457        | 0.1449        | 0.006**        |
|                               | Hue                            | -0.78985       | 0.61331        | 0.1314        | 0.011*         |
| <b>Wine amino acids</b>       | Alanine                        | <b>0.11831</b> | <b>0.99298</b> | <b>0.124</b>  | <b>0.017*</b>  |
|                               | Asparagine                     | 0.55124        | 0.83435        | 0.1156        | 0.023*         |
|                               | Glutamate                      | 0.39571        | 0.91837        | 0.103         | 0.031*         |
|                               | Glycine                        | 0.62968        | 0.77685        | 0.1847        | 0.002**        |
|                               | Serine                         | 0.54731        | 0.83693        | 0.0936        | 0.04*          |
|                               | Threonine                      | 0.20213        | 0.97936        | 0.0934        | 0.049*         |
|                               | Tryptophan                     | 0.56228        | 0.82695        | 0.119         | 0.025*         |

|                               |                        |          |          |        |          |
|-------------------------------|------------------------|----------|----------|--------|----------|
| <b>Wine ferment. products</b> | Acetic acid            | -0.99914 | -0.04153 | 0.1689 | 0.003**  |
|                               | Propanoic acid         | -0.96827 | 0.24991  | 0.118  | 0.012*   |
|                               | 3-methylbutanol        | 0.99079  | 0.13538  | 0.1184 | 0.02*    |
|                               | 2-methylbutanol        | 0.98968  | 0.14332  | 0.108  | 0.034*   |
|                               | Butanoic acid          | -0.89212 | 0.4518   | 0.1298 | 0.013*   |
|                               | 2-phenyl ethyl ethanol | 0.70731  | 0.7069   | 0.2064 | 0.001*** |
|                               | 2-phenyl ethyl acetate | 0.82725  | 0.56183  | 0.1249 | 0.013*   |

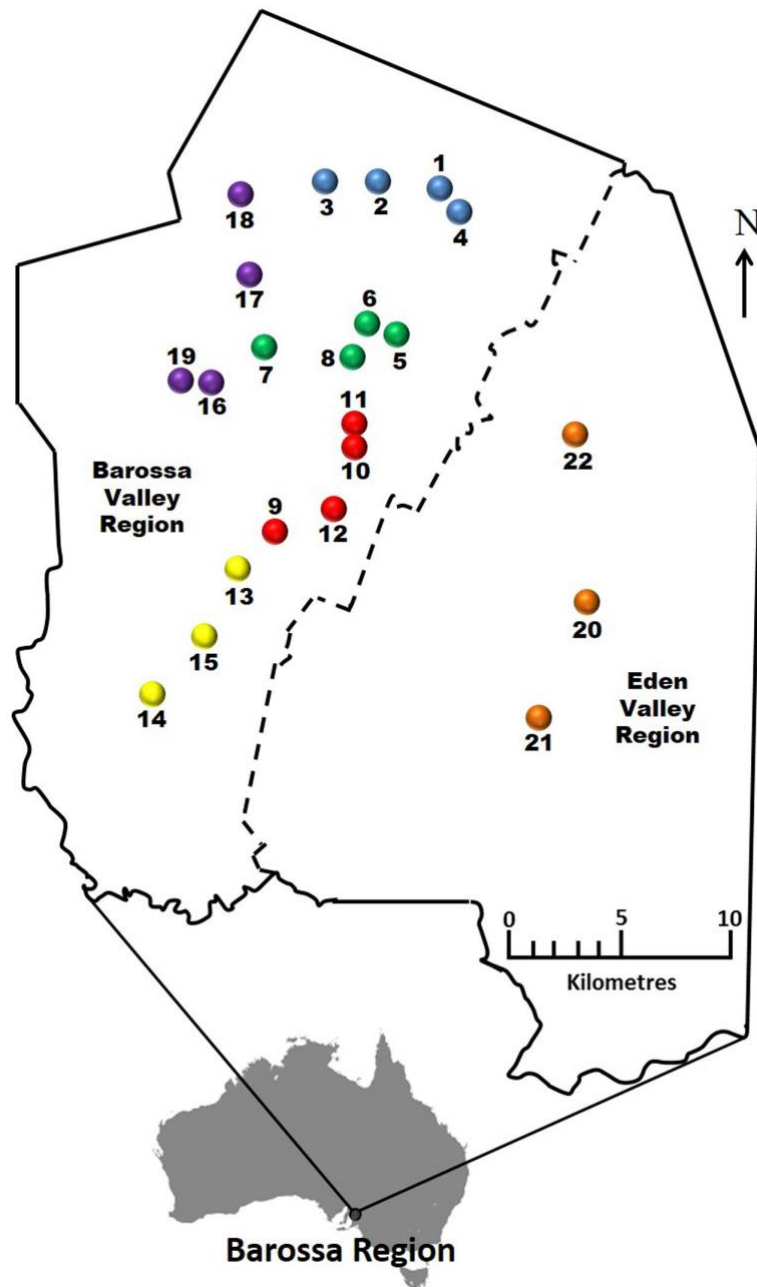

809

810 **Supplementary Figure 1. Location of 22 Barossa vineyard sites.** Vineyards are color coded  
811 according to the six wine sub-regions as defined in Xie et al. (2017): Northern Grounds: Blue, Southern  
812 Grounds: Yellow, Central Grounds: Green, Eastern Ridge: Red, Western Ridge: Purple, Eden Valley:  
813 Orange. Map modified from Xie et al. (2017).

814

815

816

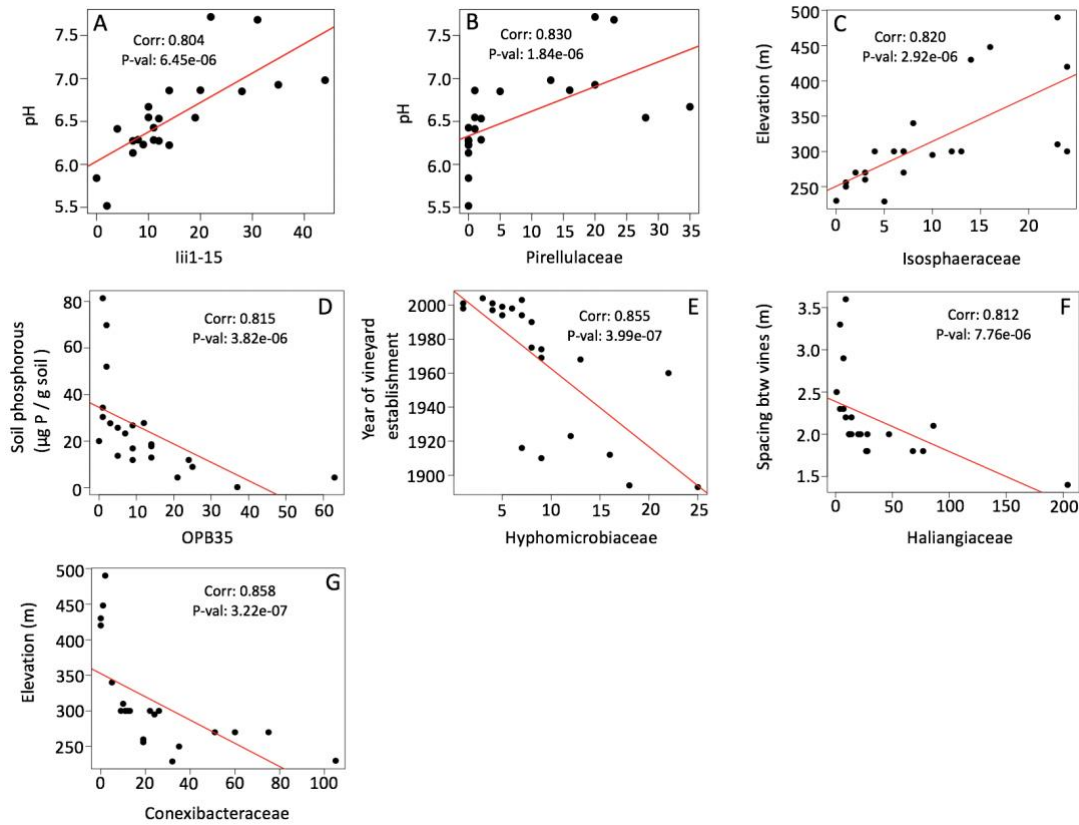

817

818 **Supplementary Figure 2. Association between taxon abundance and environmental/agronomical**  
819 **variables in Barossa Region vineyard soil bacteria communities.** Correlations were tested using  
820 Spearman's rank correlation coefficient with its probability estimate for significance (P) and  
821 implemented using the function *rcorr* in the R package *Hmisc*. Correlation coefficient and P values for  
822 each of the comparisons are included in each inset.

823

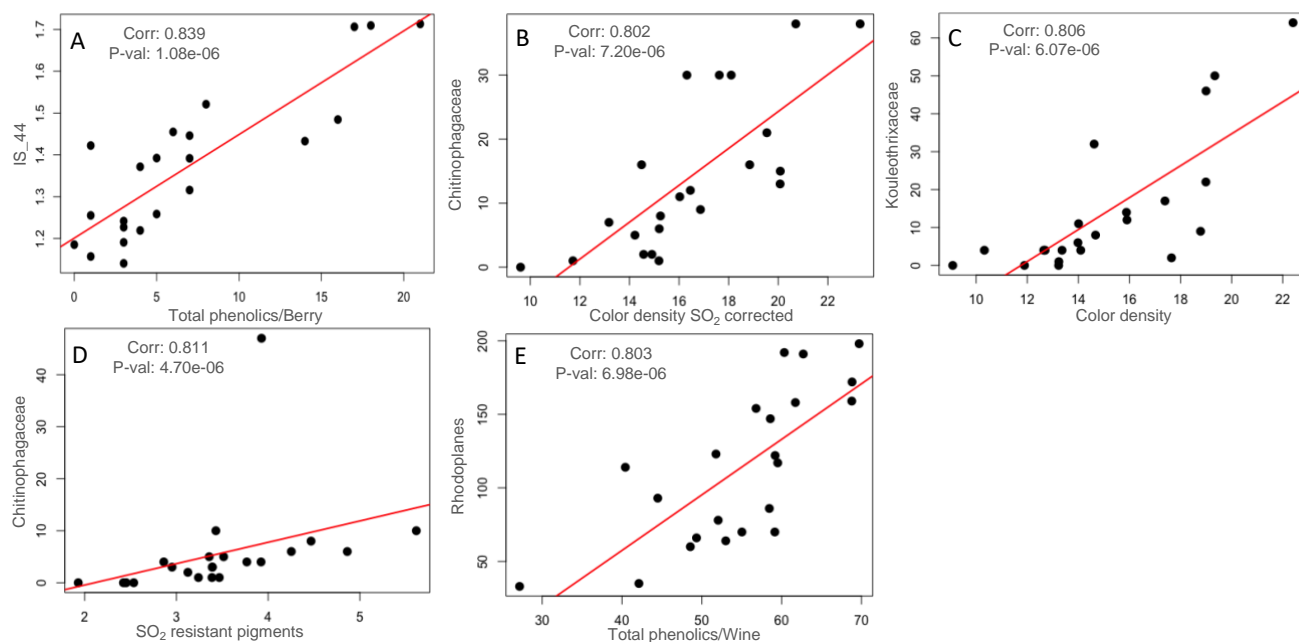

824

825 **Supplementary Figure 3. Association between taxon abundance and fruit/wine traits in Barossa**  
826 **Region vineyard soil bacteria communities.** Relationship between taxon abundance and fruit (A) and  
827 wine (B-F) traits. Correlations were tested using Spearman's rank correlation coefficient with its  
828 probability estimate for significance (P) and implemented using the function *rcorr* in the R package  
829 *Hmisc*. Correlation coefficient and P values for each of the comparisons are included in each inset.
